# Supplementary material for: Resting-State fMRI Functional Connectivity Is Associated with Sleepiness, Imagery, and Discontinuity of Mind
Source: PubMed Central journal article supplement (PMC4634926; doi:10.1371/journal.pone.0142014), 2015-11-05

Fig. S1a. Signal ICA component (Occipital Visual)

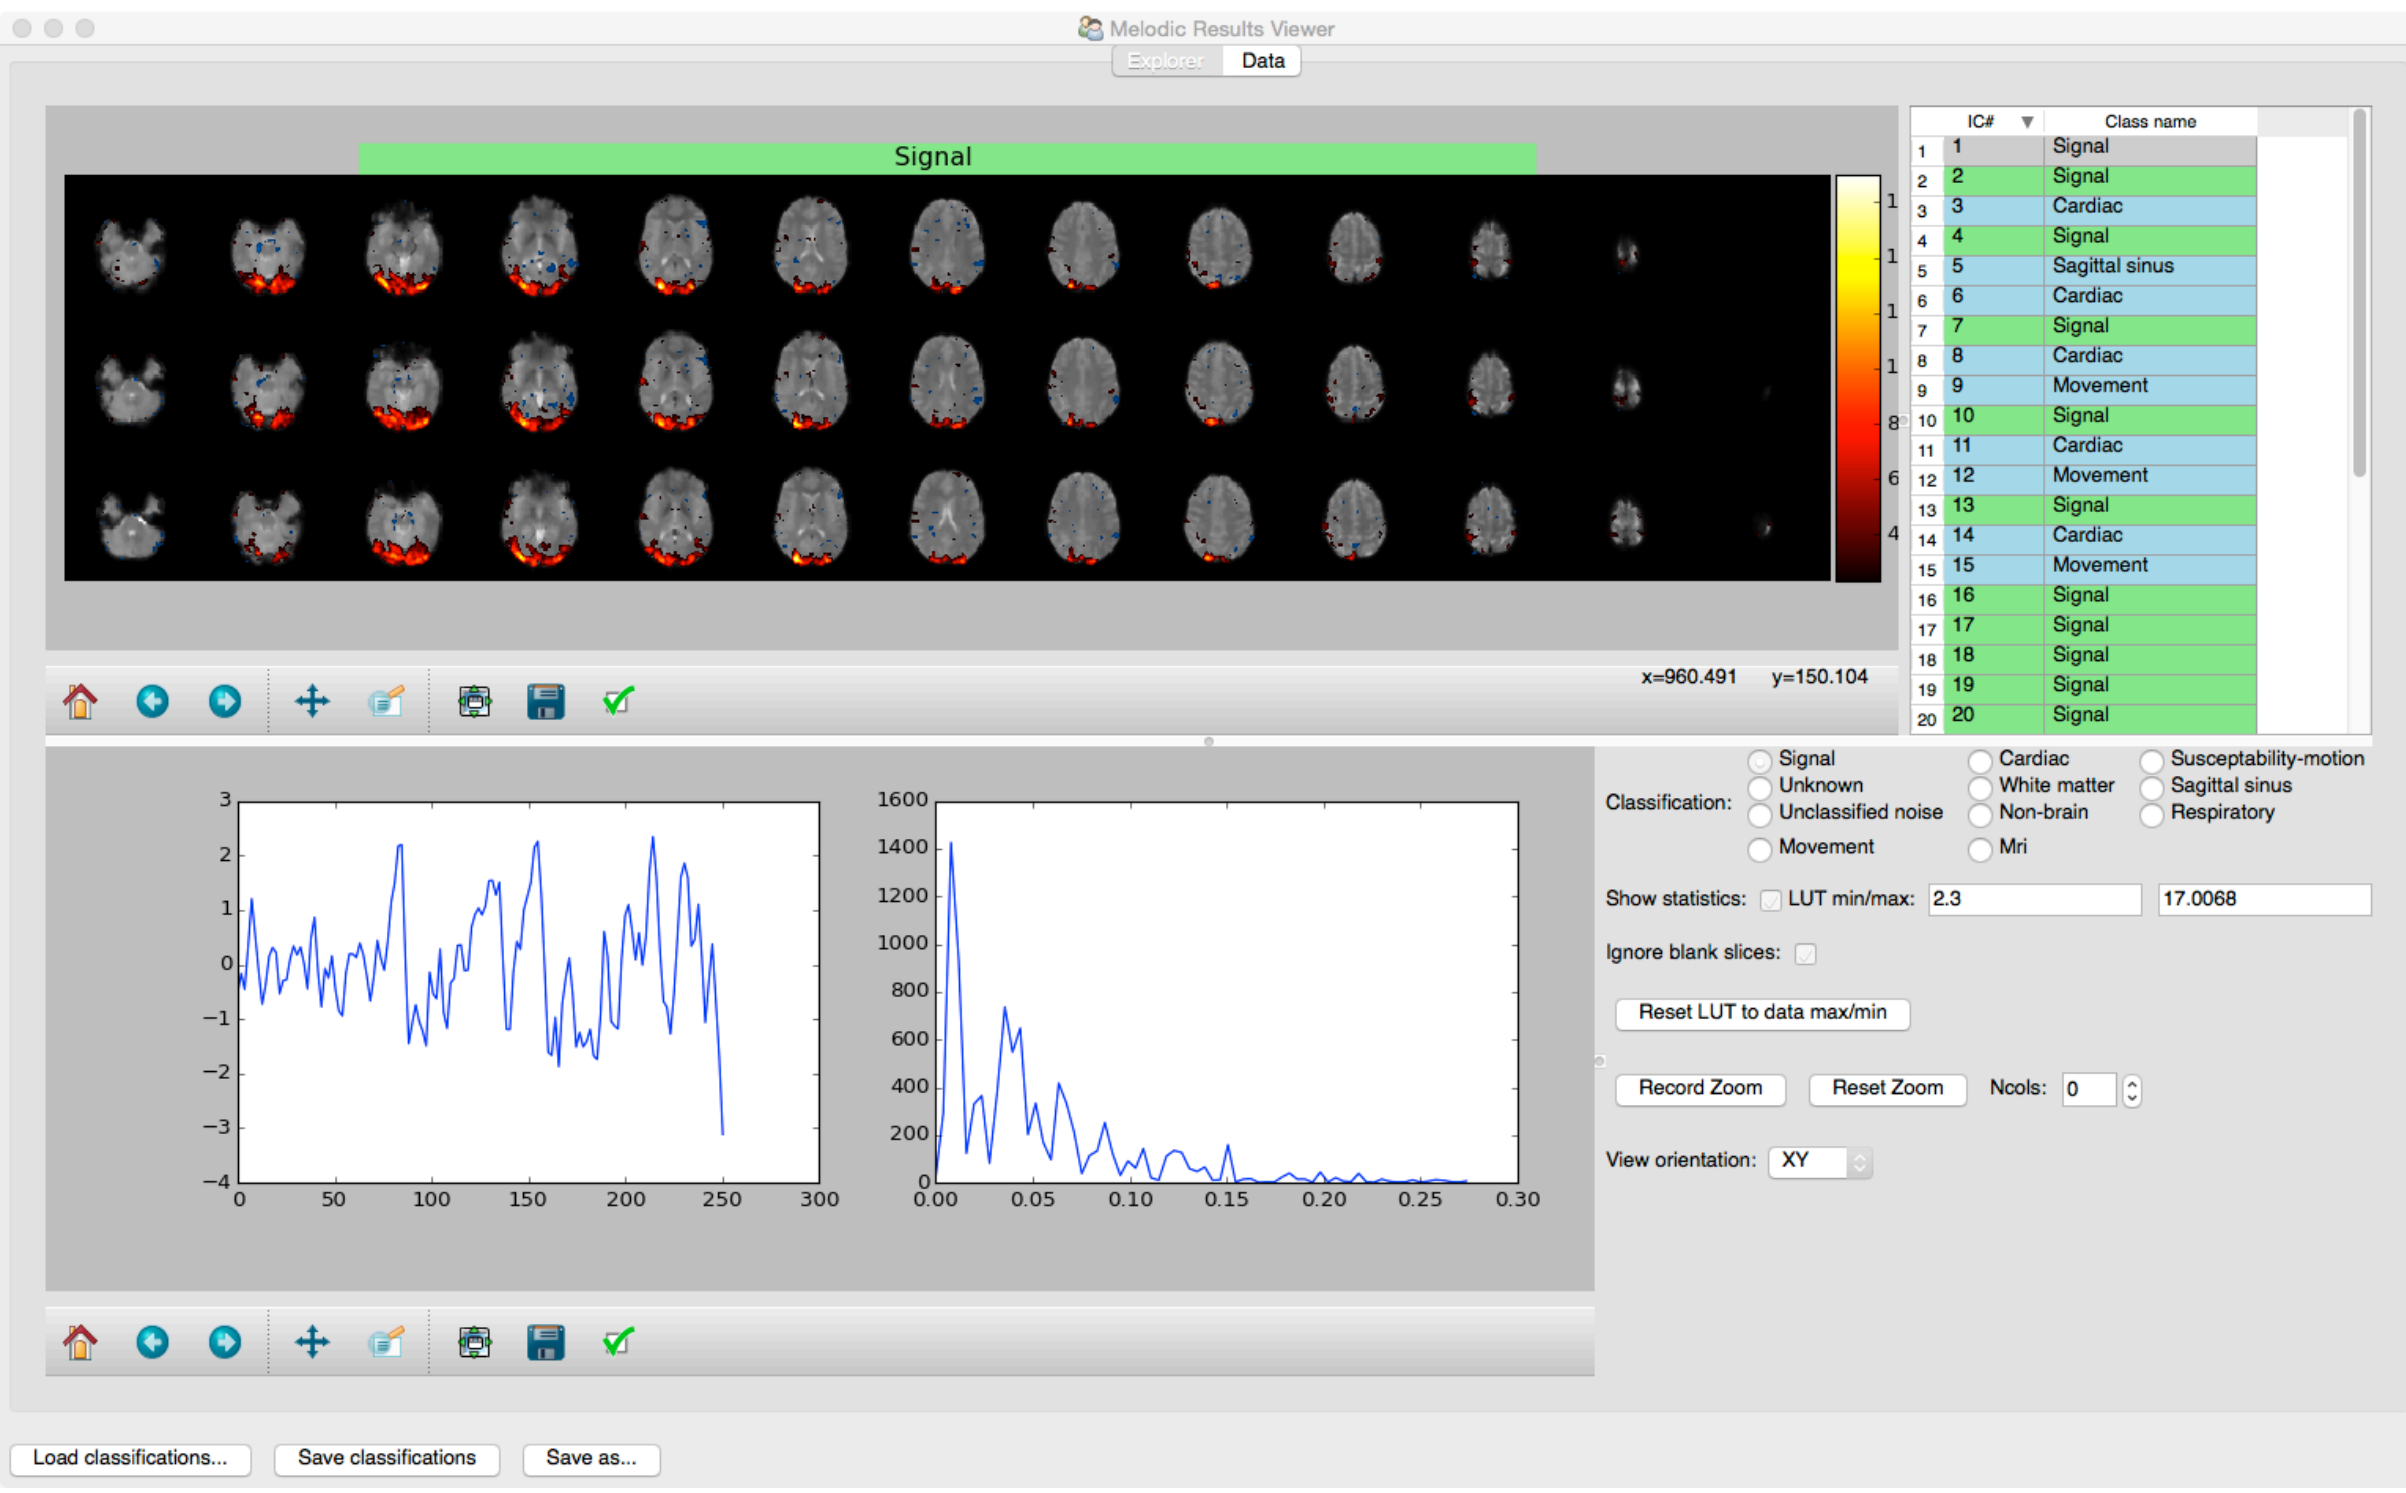

Fig. S1b. Signal ICA component (Medial Visual)

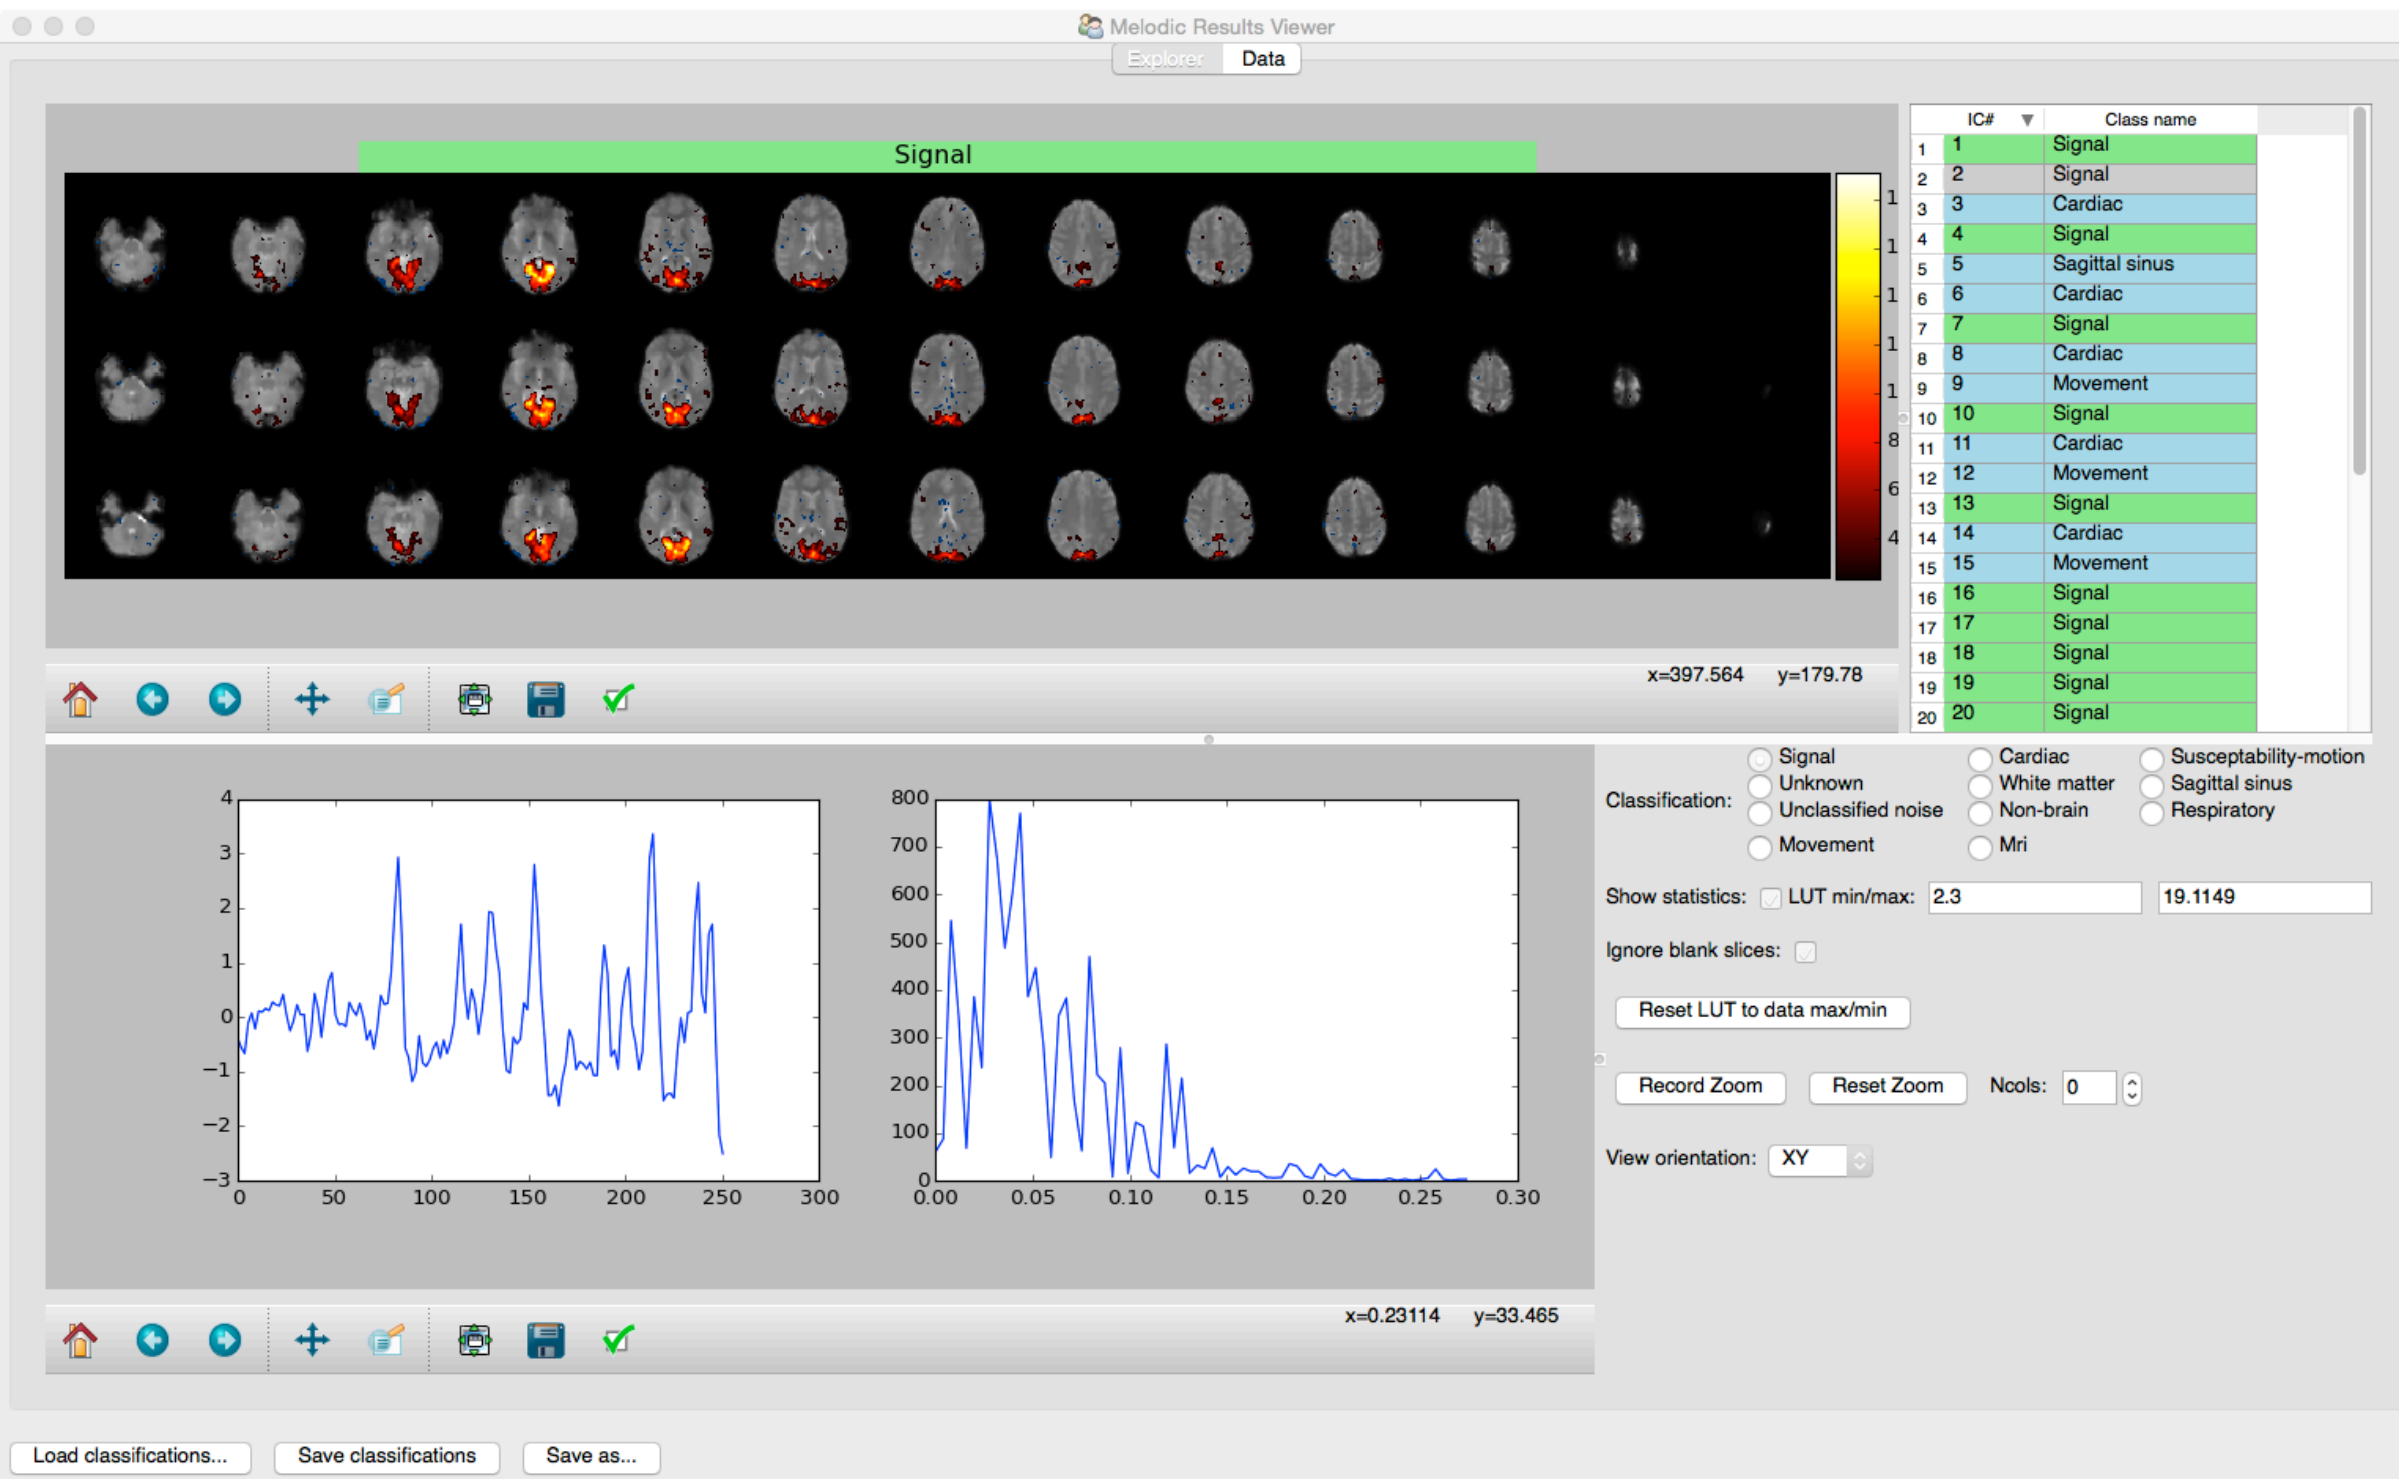

Fig. S1c. Signal ICA component (Default Mode Network)

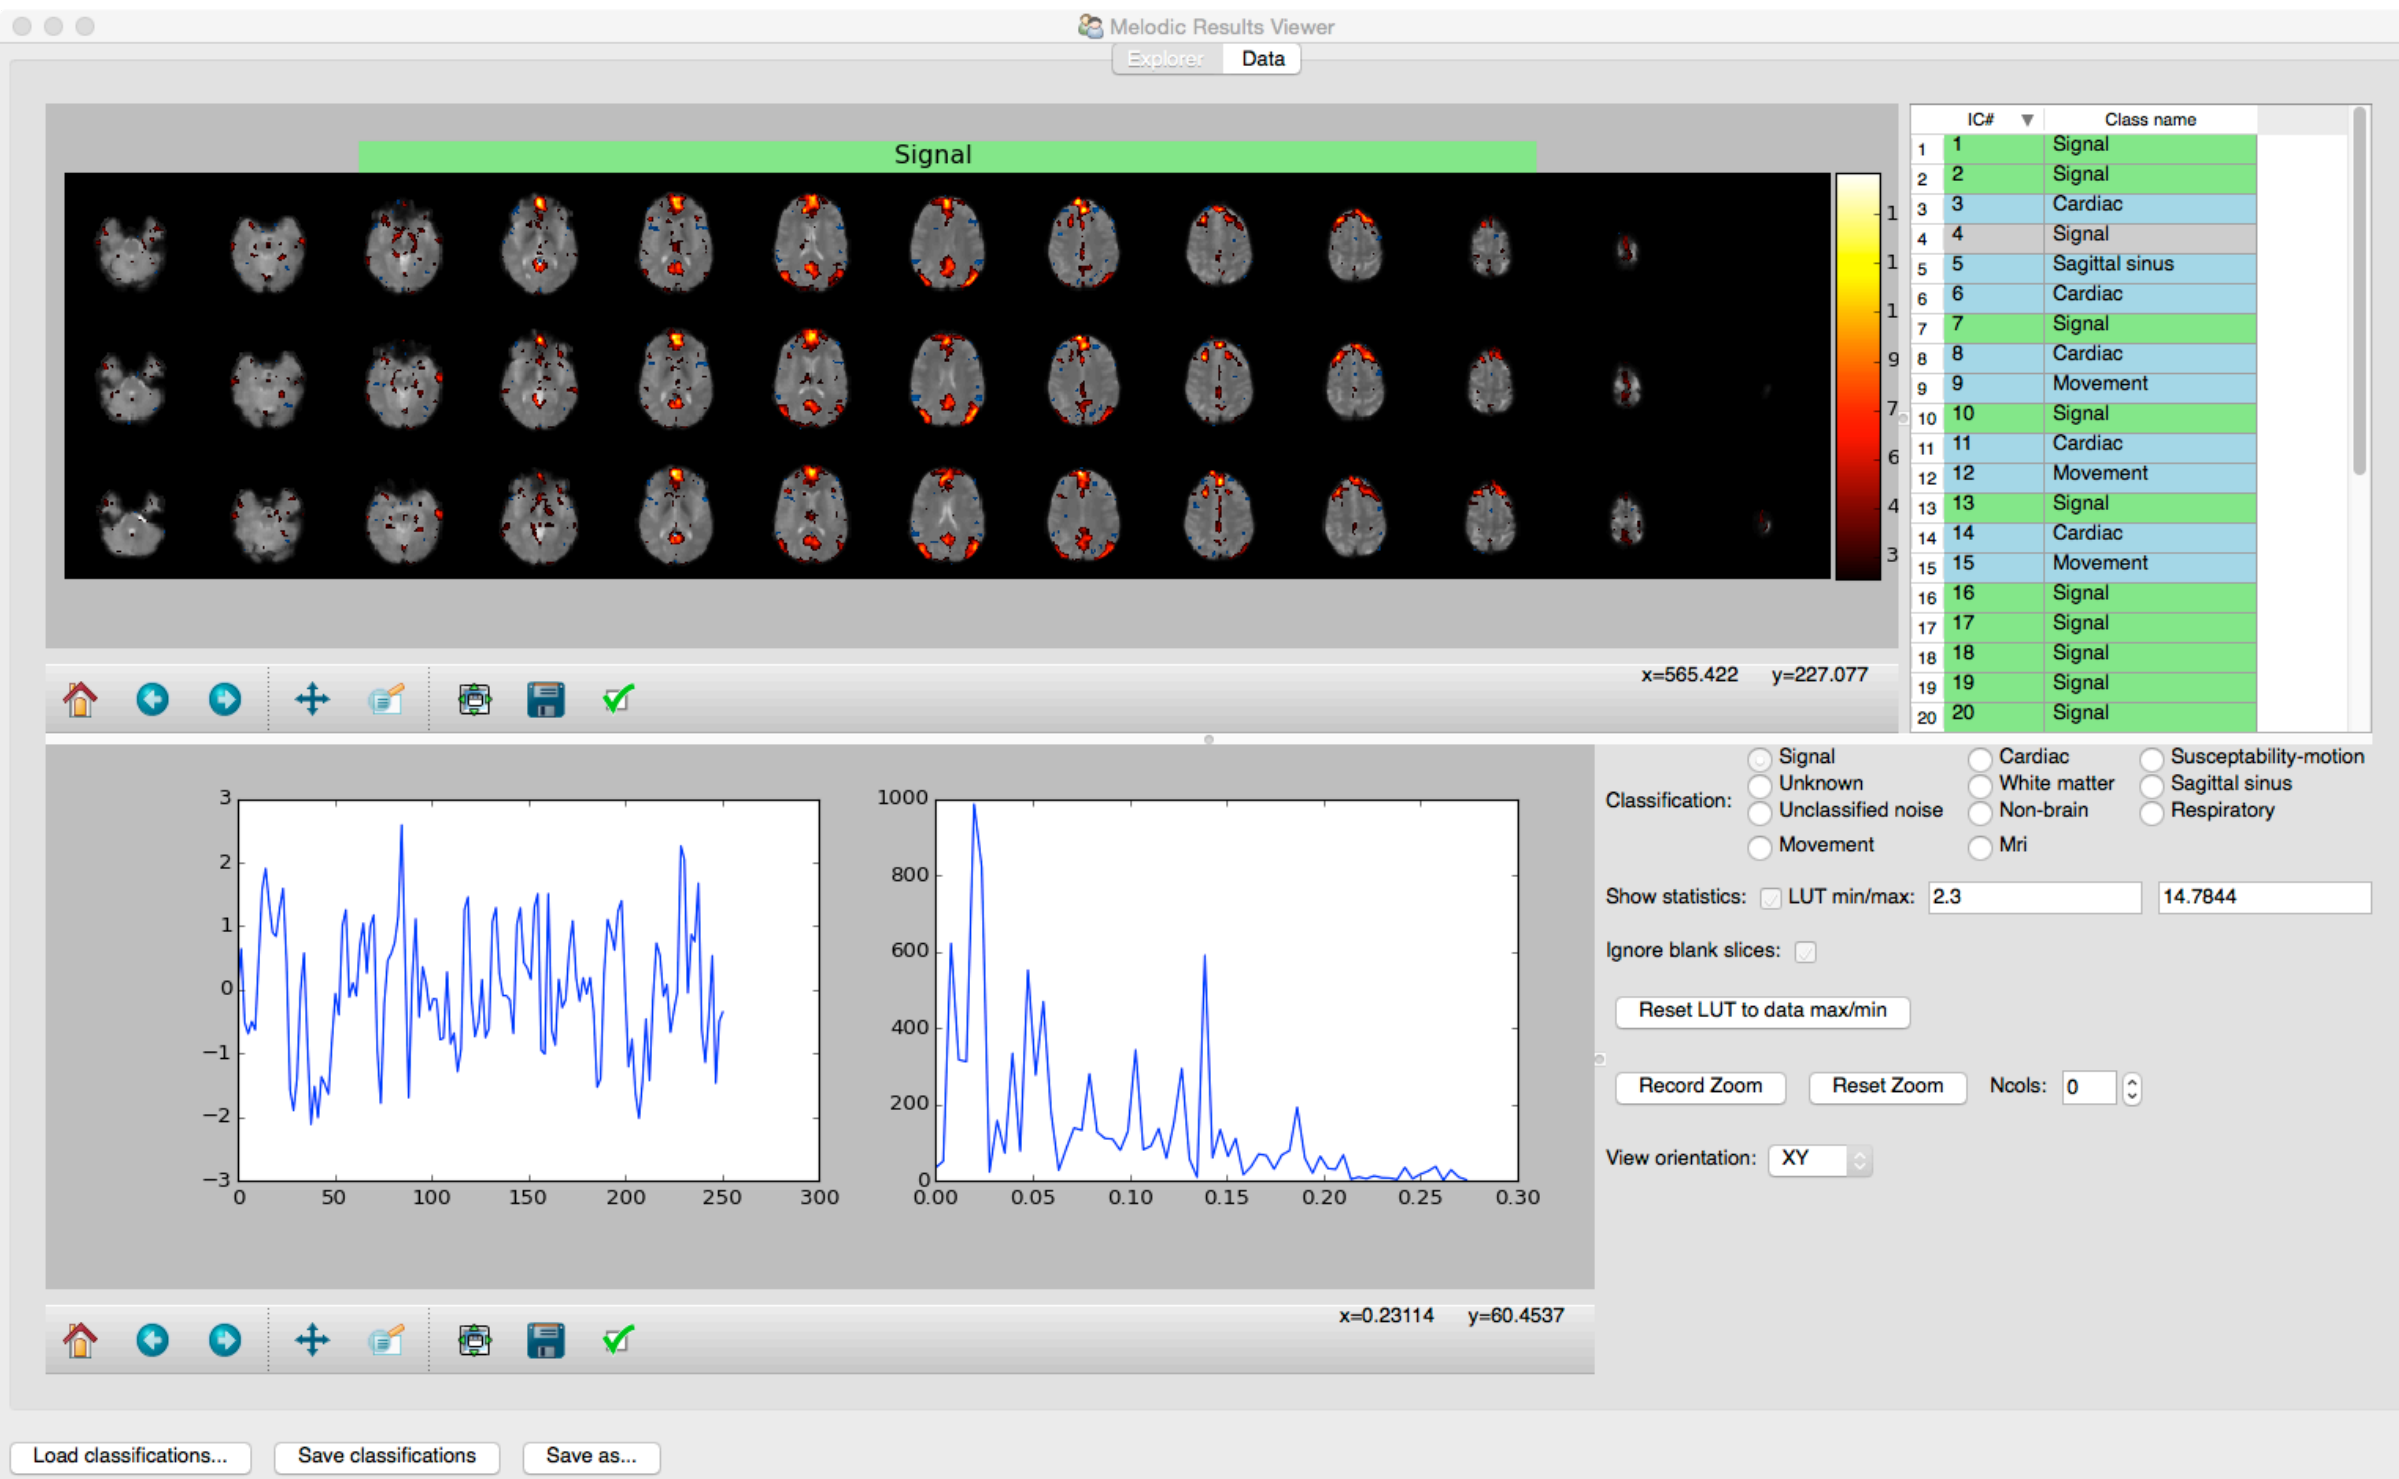

Fig. S1d. Artefactual ICA component (Cardiac)

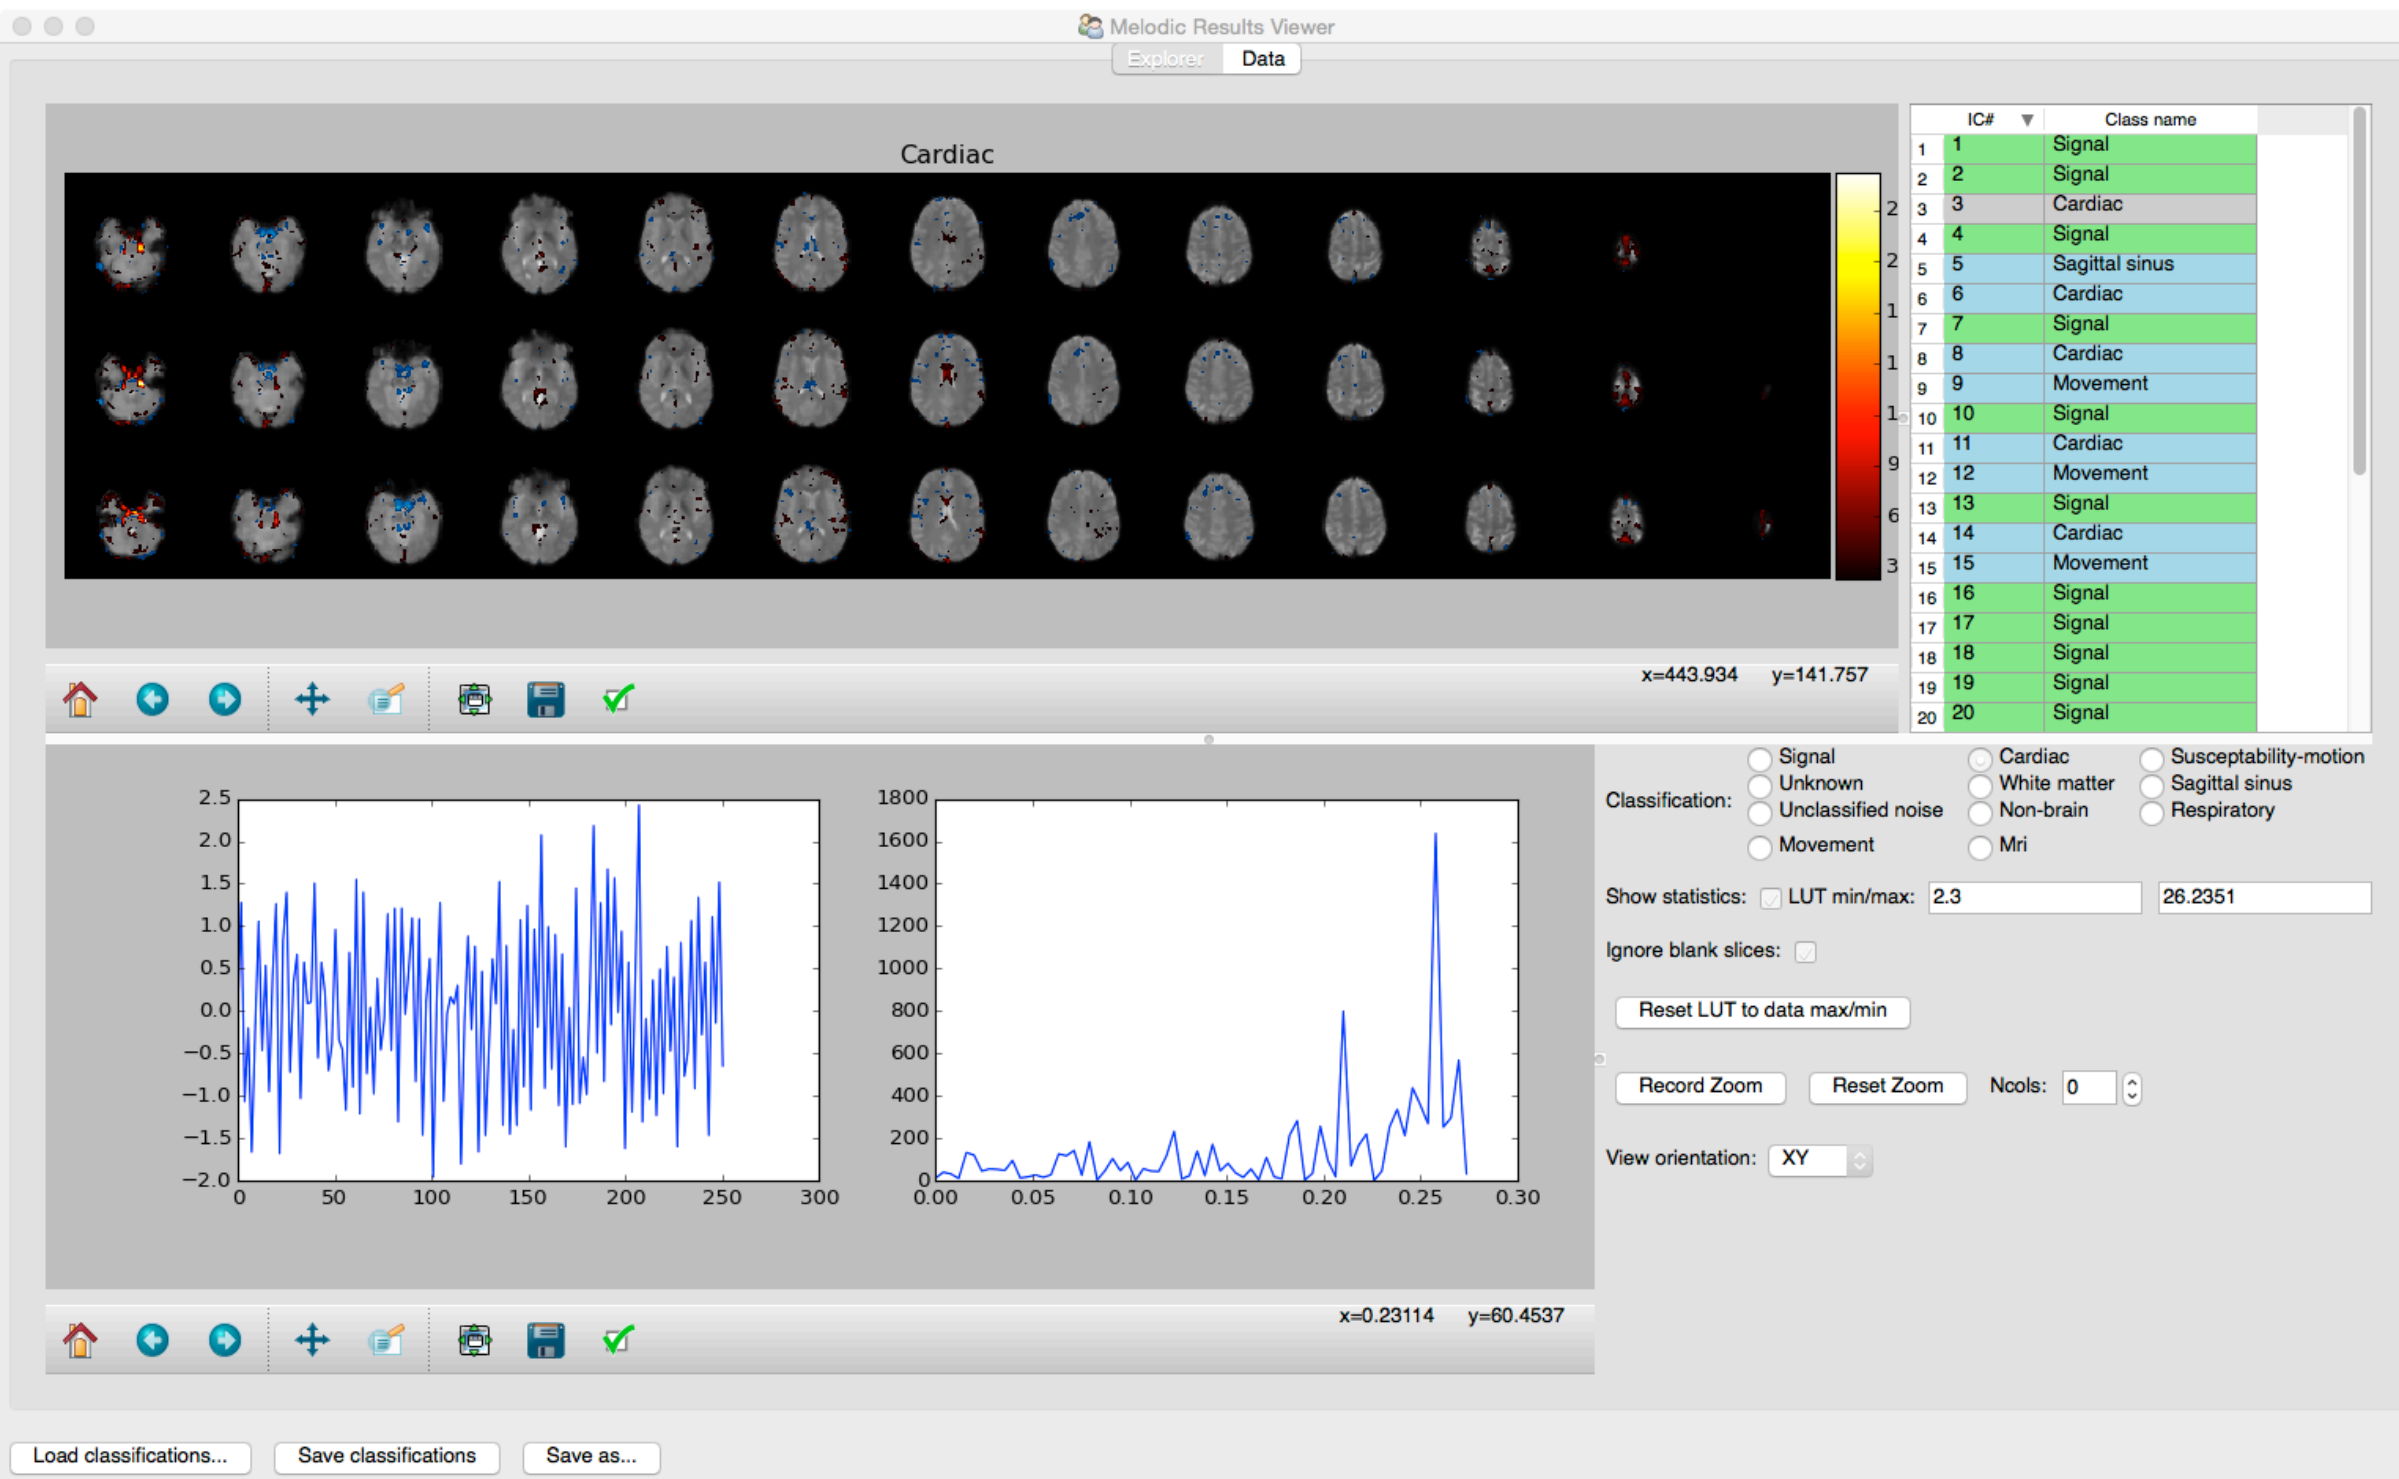

Fig. S1e. Artefactual ICA component (Veins)

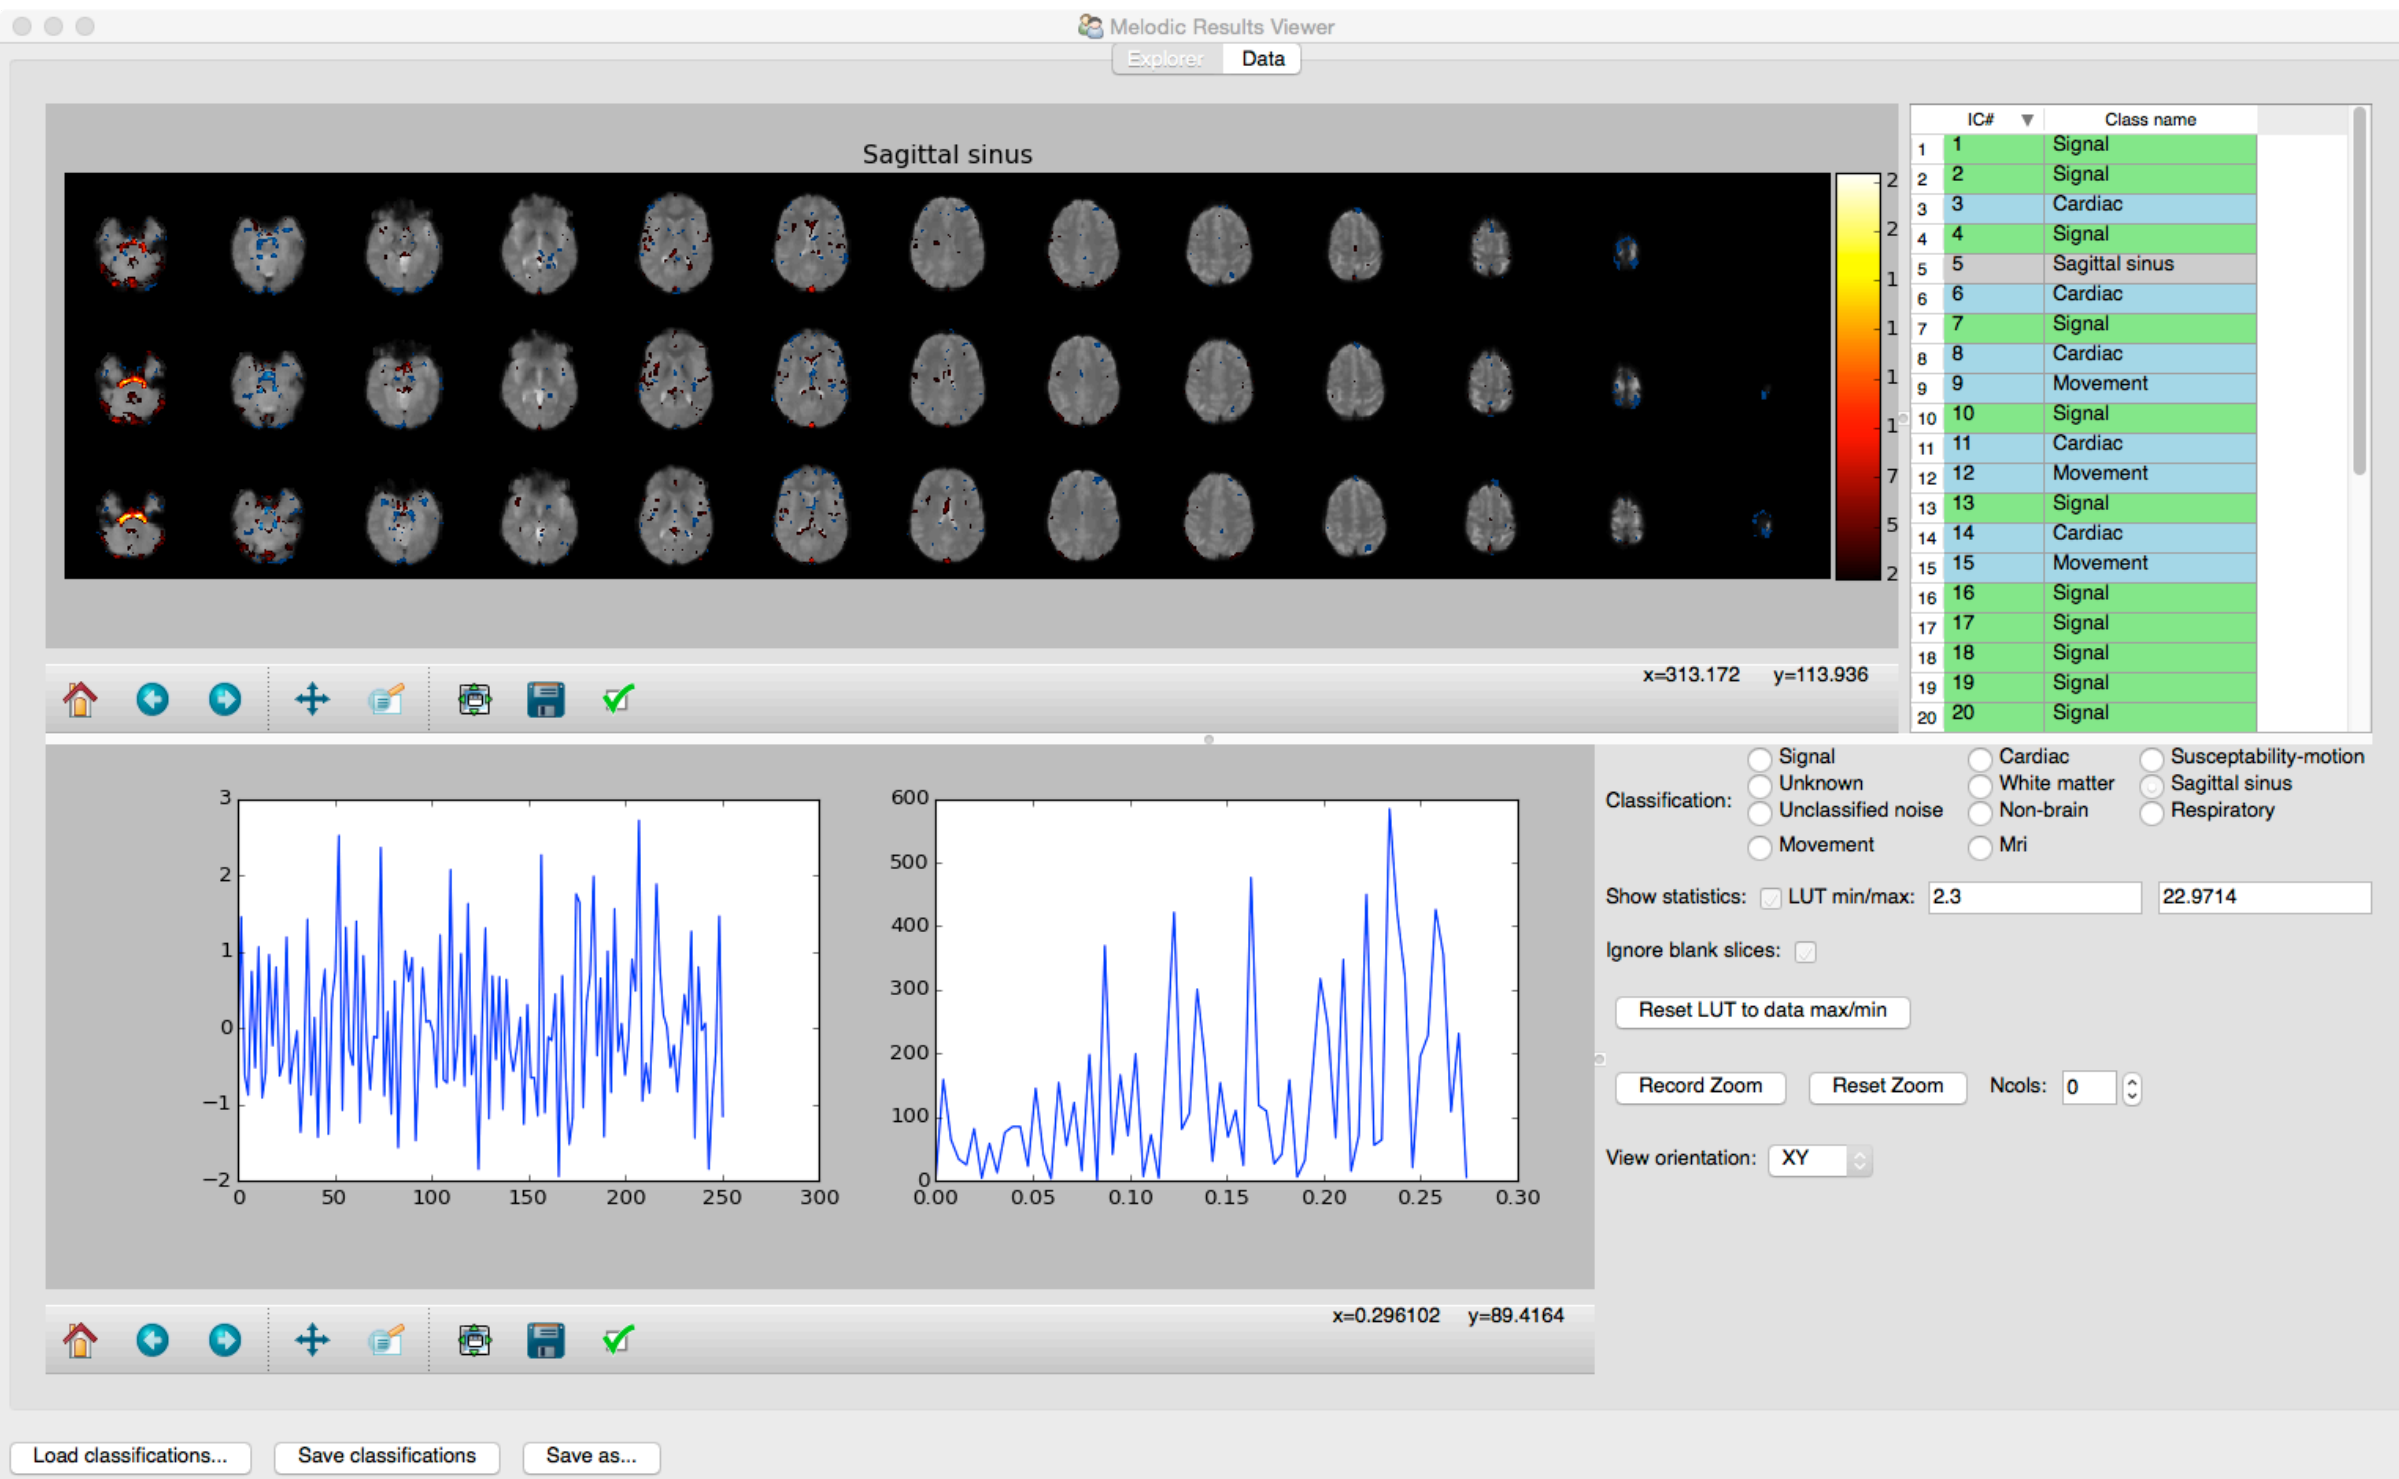

Fig. S1f. Artefactual ICA component (Movement)

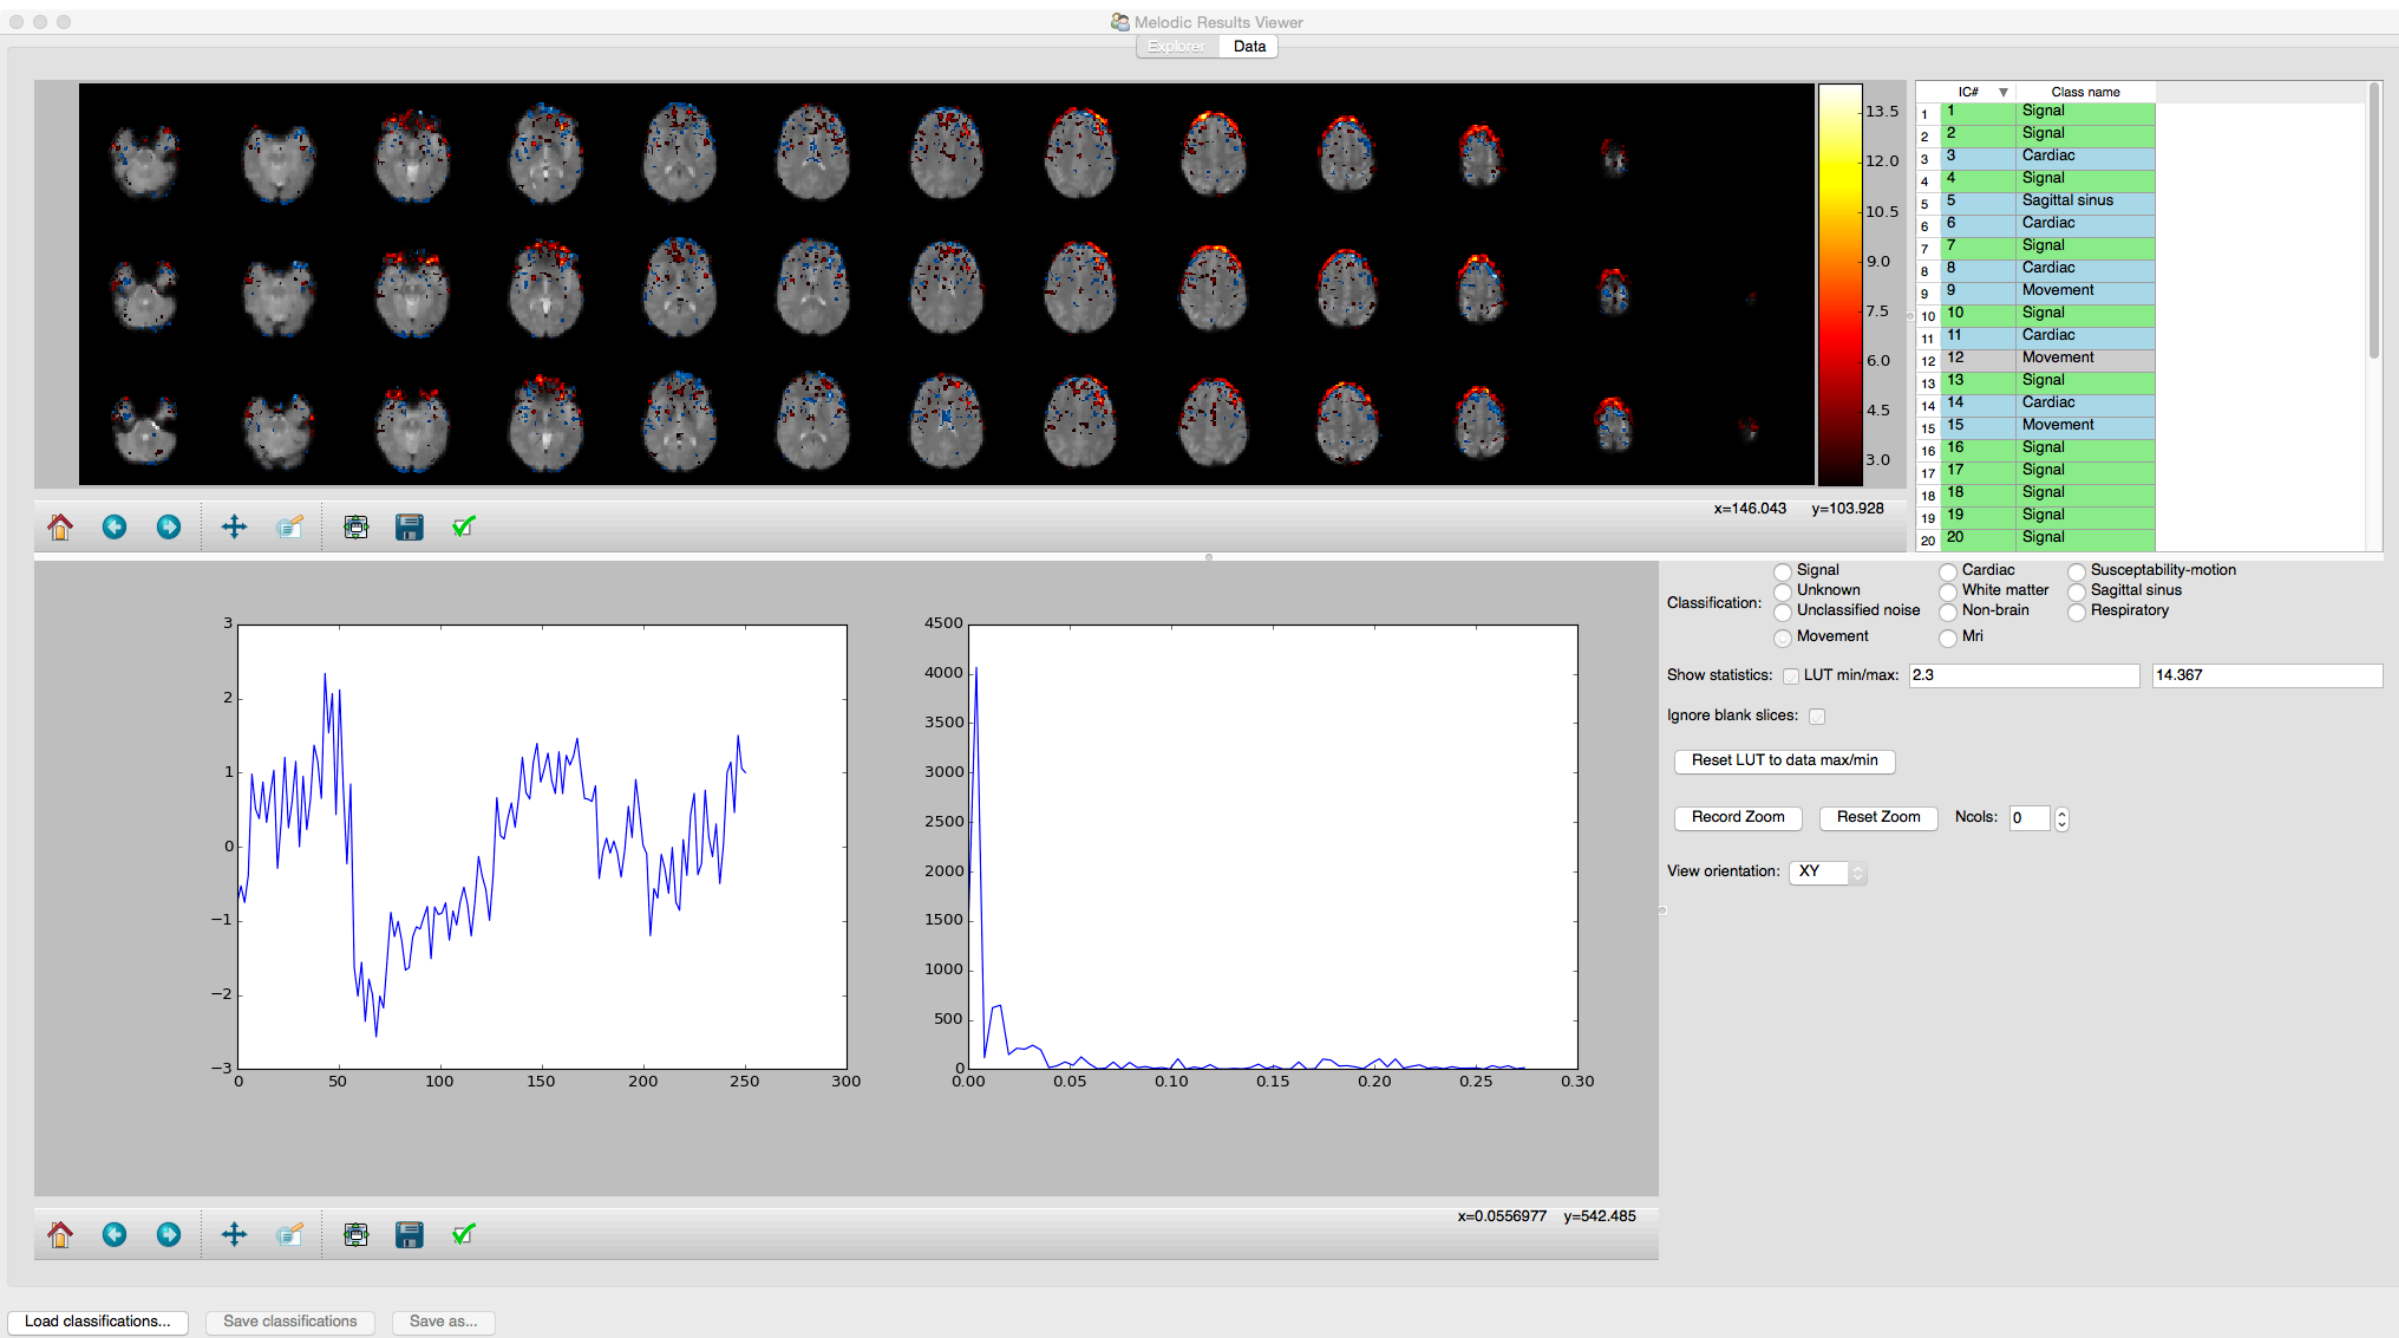

Supplement: pone.0142014.s001.pdf [file pone.0142014.s001.pdf]
